# Supplementary material for: Detecting depression severity using weighted random forest and oxidative stress biomarkers
Source: PubMed Central journal article supplement (PMC11250802; doi:10.1038/s41598-024-67251-y), 2024-07-15
Supplement: 41598_2024_67251_MOESM1_ESM.pdf [file 41598_2024_67251_MOESM1_ESM.pdf]

## Multimedia Appendix 1. Hyperparameter tuning.

The hyperparameters of the ML classifiers obtained through the grid search cross-validation were as follows:

Table 1: Hyperparameter value range and optimal values for all ML methods.

| Model                      | Hyperparameters                                                                                                                                                                                                                                                  | Best combination                                                                                                              |                                                                                                                                |
|----------------------------|------------------------------------------------------------------------------------------------------------------------------------------------------------------------------------------------------------------------------------------------------------------|-------------------------------------------------------------------------------------------------------------------------------|--------------------------------------------------------------------------------------------------------------------------------|
|                            |                                                                                                                                                                                                                                                                  | All factors                                                                                                                   | Oxidative stress factors only                                                                                                  |
| Binary Classification      |                                                                                                                                                                                                                                                                  |                                                                                                                               |                                                                                                                                |
| LR                         | C_ values: [0.001, 0.01, 0.1, 1, 10, 100]<br>Penalty: [l1, l2]<br>Solvers: liblinear, lbfgs, newton-cg, sag, saga]                                                                                                                                               | C_ value: 1<br>Penalty: l2<br>Solver: liblinear                                                                               | C_ value: 0.001<br>Penalty: l2<br>Solver: liblinear                                                                            |
| RF                         | n_estimators: [50, 100, 150, 200, 300]<br>max_depth: [None, 5, 10, 15, 20, 25, 30]<br>min_samples_split: [2, 5, 10]<br>min_samples_leaf: [1, 2, 4]<br>bootstrap: [True, False]<br>max_features: [auto, sqrt, log2]<br>max_leaf_nodes: [None, 5, 10, 20, 50, 100] | n_estimators: 50<br>max_depth: 15<br>min_samples_split: 2<br>min_samples_leaf: 1<br>bootstrap: False<br>max_leaf_nodes: None  | n_estimators: 50<br>max_depth: None<br>min_samples_split: 5<br>min_samples_leaf: 1<br>bootstrap: False<br>max_leaf_nodes: None |
| KNN                        | n_neighbors : [3, 5,7,9,11,13,15]<br>weights: [uniform, distance]<br>metric: [minkowski, euclidean, manhattan]                                                                                                                                                   | n_neighbors: 11<br>weights: distance<br>Metric: manhattan                                                                     | n_neighbors: 15<br>weights: distance<br>Metric: manhattan                                                                      |
| SVM                        | C: [0.1, 1, 10, 100]<br>gamma: [1, 0.1, 0.01, 0.001]<br>kernel: [linear, rbf]                                                                                                                                                                                    | C: 1<br>gamma: 0.1<br>kernel: rbf                                                                                             | C: 1<br>gamma: 1<br>kernel:rbf                                                                                                 |
| NB                         | Naive Bayes has almost no hyperparameters to tune, so it usually generalizes well                                                                                                                                                                                |                                                                                                                               |                                                                                                                                |
| WLR                        | solvers = ['newton-cg', 'liblinear']<br>penalty = ['l1', 'l2']<br>c_values = [100, 10, 1.0, 0.1, 0.01]                                                                                                                                                           | solver: newton-cg<br>penalty: l2<br>C: 1                                                                                      | solver: liblinear<br>penalty: l2<br>C: 0.1                                                                                     |
| WRF                        | n_estimators: [50, 100, 150, 200, 300]<br>max_depth: [None, 5, 10, 15, 20, 25, 30]<br>min_samples_split: [2, 5, 10]<br>min_samples_leaf: [1, 2, 4]<br>bootstrap: [True, False]<br>max_features: [auto, sqrt, log2]<br>max_leaf_nodes: [None, 5, 10, 20, 50, 100] | n_estimators: 50<br>max_depth: None<br>min_samples_split: 2<br>min_samples_leaf: 1<br>bootstrap: True<br>max_leaf_nodes: None | n_estimators: 100<br>max_depth: 25<br>min_samples_split: 2<br>min_samples_leaf: 1<br>bootstrap: False<br>max_leaf_nodes: None  |
| Multi-class Classification |                                                                                                                                                                                                                                                                  |                                                                                                                               |                                                                                                                                |

|     |                                                                                                                                                                                                                                                                  |                                                                                                                               |                                                                                                                               |
|-----|------------------------------------------------------------------------------------------------------------------------------------------------------------------------------------------------------------------------------------------------------------------|-------------------------------------------------------------------------------------------------------------------------------|-------------------------------------------------------------------------------------------------------------------------------|
| LR  | solvers = ['newton-cg', 'lbfgs', 'liblinear']<br>penalty = ['l1', 'l2']<br>c_values = [100, 10, 1.0, 0.1, 0.01]                                                                                                                                                  | Solver: liblinear<br>Penalty: l2<br>C: 10                                                                                     | Solver: liblinear<br>Penalty: l2<br>C: 0.001                                                                                  |
| RF  | n_estimators: [50, 100, 150, 200, 300]<br>max_depth: [None, 5, 10, 15, 20, 25, 30]<br>min_samples_split: [2, 5, 10]<br>min_samples_leaf: [1, 2, 4]<br>bootstrap: [True, False]<br>max_features: [auto, sqrt, log2]<br>max_leaf_nodes: [None, 5, 10, 20, 50, 100] | n_estimators: 100<br>max_depth: 15<br>min_samples_split: 2<br>min_samples_leaf: 1<br>bootstrap: False<br>max_leaf_nodes: None | n_estimators: 100<br>max_depth: 15<br>min_samples_split: 2<br>min_samples_leaf: 1<br>bootstrap: False<br>max_leaf_nodes: None |
| KNN | n_neighbors: [5,7,9,11,13,15]<br>weights: ['uniform','distance']<br>metric:['minkowski','euclidean', 'manhattan']                                                                                                                                                | n_neighbors: 13<br>weights: distance<br>Metric: Manhattan                                                                     | n_neighbors: 15<br>weights: distance<br>Metric: Manhattan                                                                     |
| SVM | C: [1, 10, 100]<br>gamma: [1,0.1,0.01,0.001]<br>kernel: ['rbf']                                                                                                                                                                                                  | C: 1<br>gamma: 0.1<br>kernel: rbf                                                                                             | C: 100<br>gamma: 1<br>kernel: rbf                                                                                             |
| NB  | naive Bayes has almost no hyperparameters to tune, so it usually generalizes well                                                                                                                                                                                |                                                                                                                               |                                                                                                                               |
| WLR | solvers = ['newton-cg', 'liblinear']<br>penalty = ['l1', 'l2']<br>c_values = [100, 10, 1.0, 0.1, 0.01]                                                                                                                                                           | solver: liblinear<br>penalty: l2<br>C: 0.001                                                                                  | solver: liblinear<br>penalty: l2<br>C: 0.1                                                                                    |
| WRF | n_estimators: [50, 100, 150, 200, 300]<br>max_depth: [None, 5, 10, 15, 20, 25, 30]<br>min_samples_split: [2, 5, 10]<br>min_samples_leaf: [1, 2, 4]<br>bootstrap: [True, False]<br>max_features: [auto, sqrt, log2]<br>max_leaf_nodes: [None, 5, 10, 20, 50, 100] | n_estimators: 50<br>max_depth: None<br>min_samples_split: 2<br>min_samples_leaf: 1<br>bootstrap: True<br>max_leaf_nodes: None | n_estimators: 300<br>max_depth: 15<br>min_samples_split: 2<br>min_samples_leaf: 1<br>bootstrap: True<br>max_leaf_nodes: None  |

## Multimedia Appendix 2. Confusion Matrices

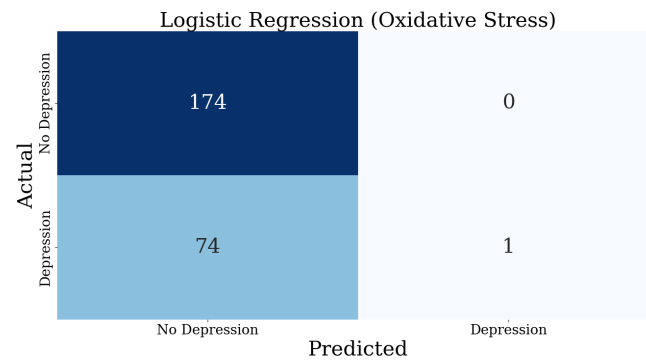

Figure 1: Confusion matrix of LR with oxidative stress biomarkers as the main features.

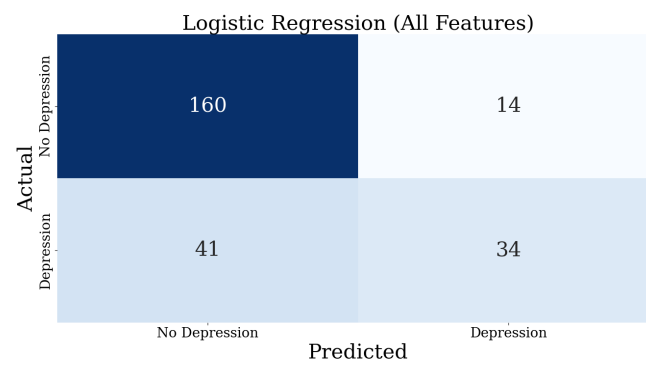

Figure 2: Confusion matrix of LR with all features.

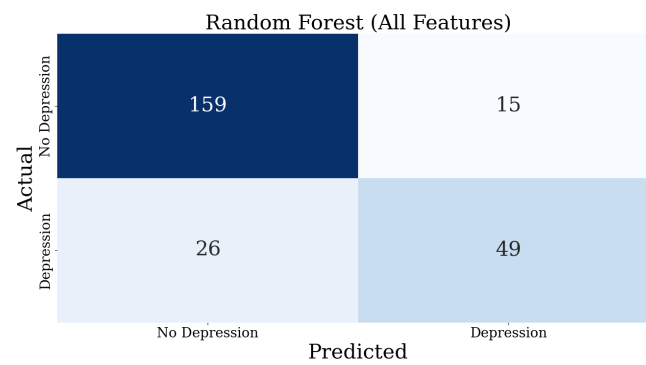

Figure 3: Confusion matrix of RF with all features.

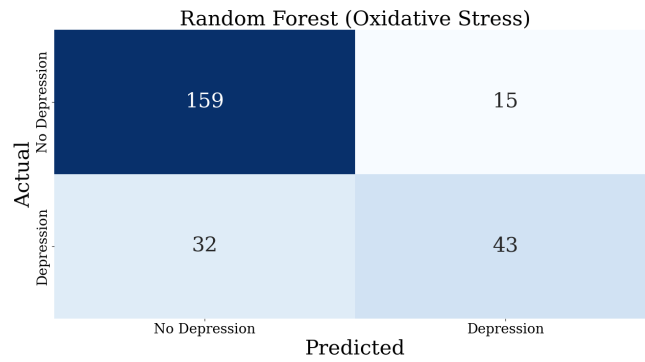

Figure 4: Confusion matrix of RF with oxidative stress biomarkers as the main features.

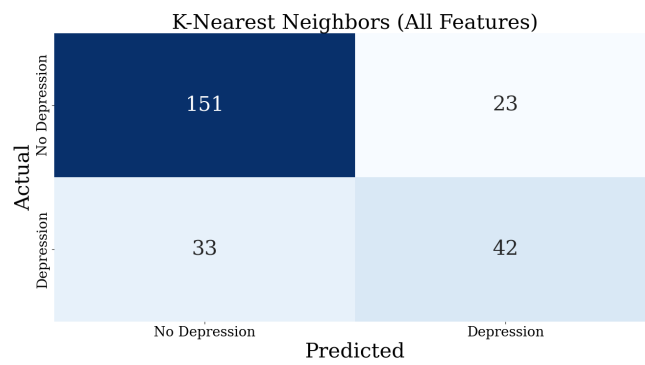

Figure 5: Confusion matrix of KNN with all features.

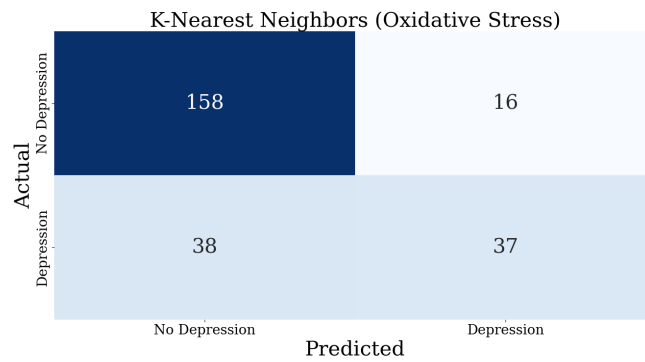

Figure 6: Confusion matrix of KNN with oxidative stress biomarkers as the main features.

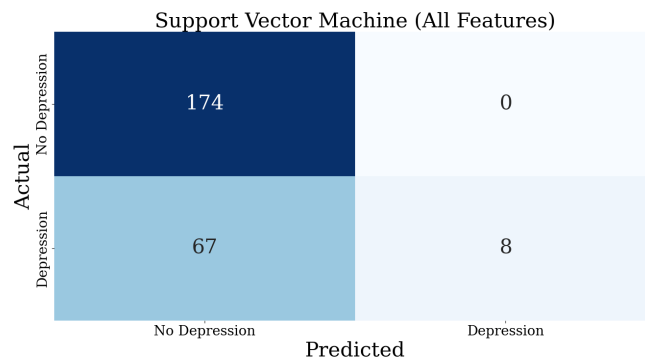

Figure 7: Confusion matrix of SVM with all features.

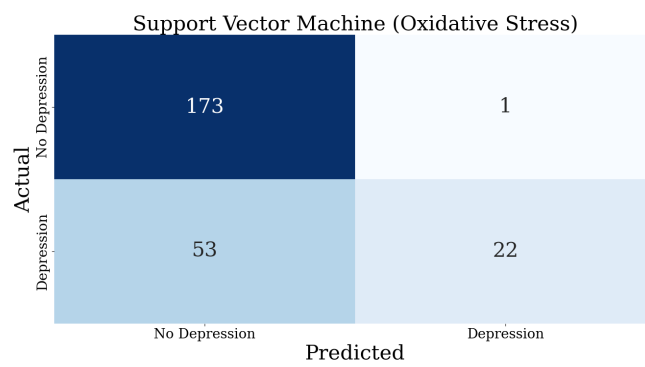

Figure 8: Confusion matrix of SVM with oxidative stress biomarkers as the main features.

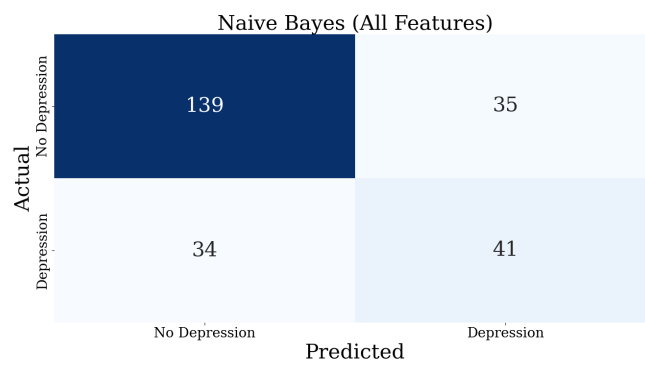

Figure 9: Confusion matrix of NB with all features.

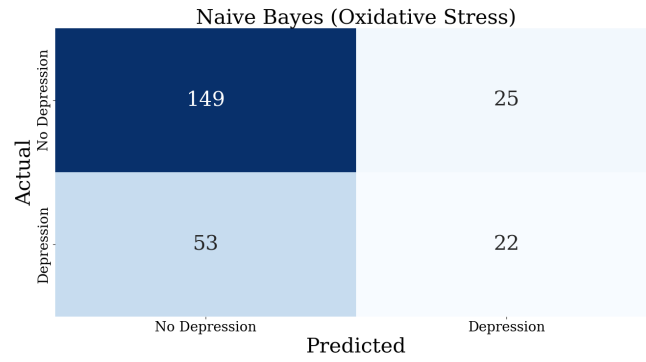

Figure 10: Confusion matrix of NB with oxidative stress biomarkers as the main features.

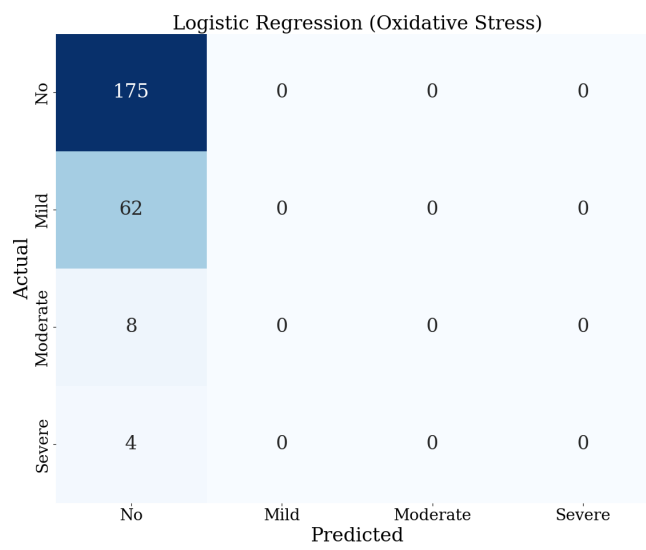

Figure 11: Confusion matrix of LR with oxidative stress biomarkers as the main features.

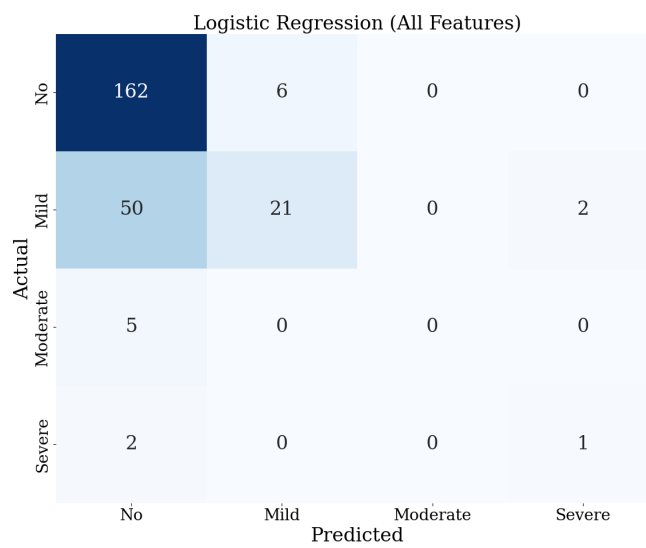

Figure 12: Confusion matrix of LR with all features.

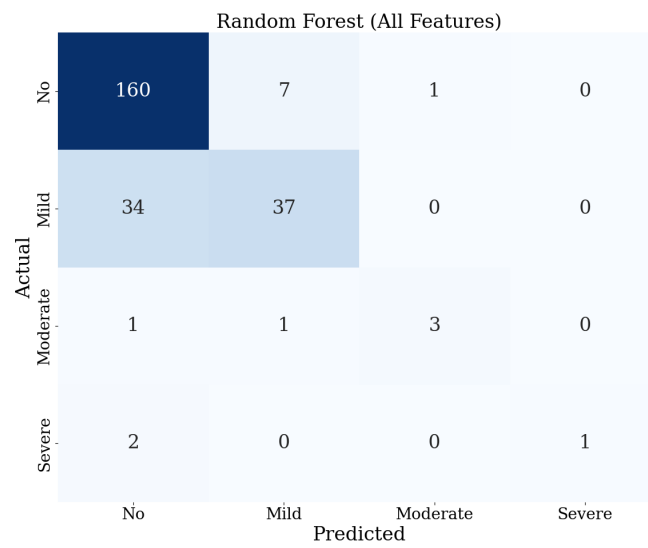

Figure 13: Confusion matrix of RF with all features.

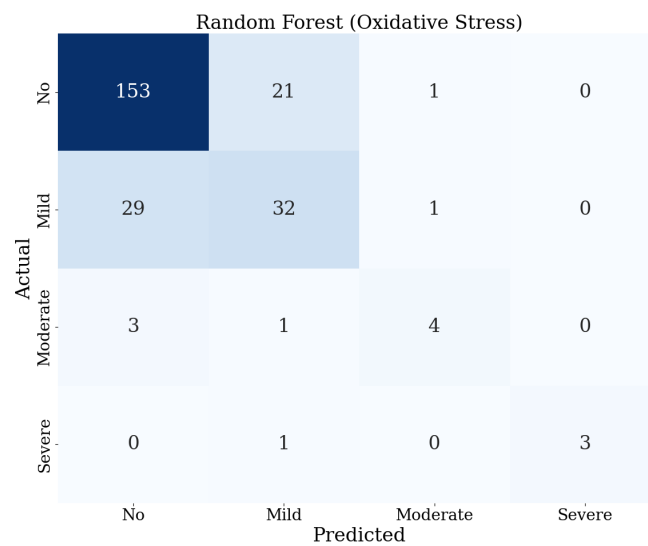

Figure 14: Confusion matrix of RF with oxidative stress biomarkers as the main features.

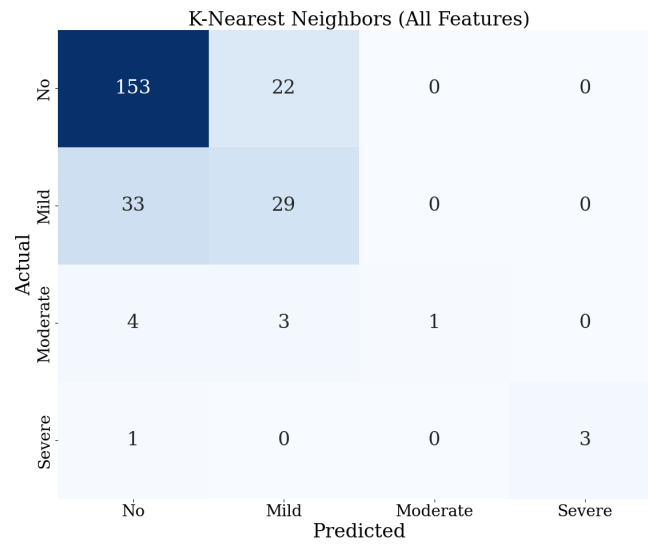

Figure 15: Confusion matrix of KNN with all features.

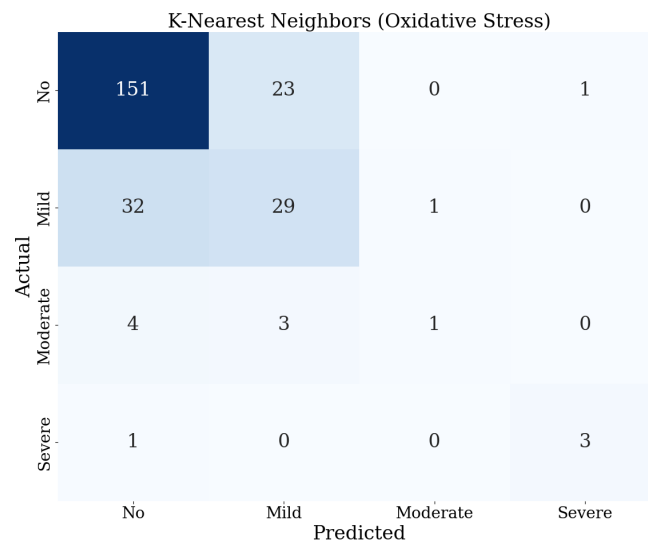

Figure 16: Confusion matrix of KNN with oxidative stress biomarkers as the main features.



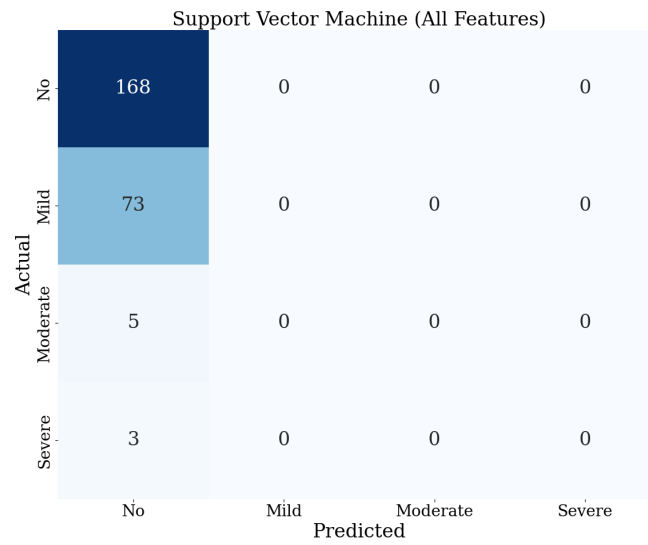

Figure 17: Confusion matrix of SVM with all features.

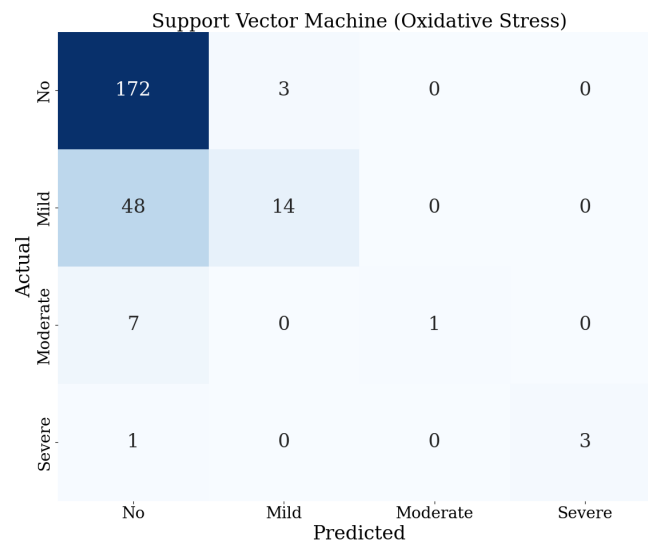

Figure 18: Confusion matrix of SVM with oxidative stress biomarkers as the main features.

Naive Bayes (All Features)

|        |          |           |      |          |        |
|--------|----------|-----------|------|----------|--------|
| Actual | No       | 135       | 26   | 0        | 7      |
|        | Mild     | 34        | 25   | 0        | 14     |
|        | Moderate | 2         | 2    | 0        | 1      |
|        | Severe   | 1         | 1    | 0        | 1      |
|        |          | No        | Mild | Moderate | Severe |
|        |          | Predicted |      |          |        |

Figure 19: Confusion matrix of NB with all features.

Naive Bayes (Oxidative Stress)

|        |          |           |      |          |        |
|--------|----------|-----------|------|----------|--------|
| Actual | No       | 146       | 25   | 1        | 3      |
|        | Mild     | 38        | 19   | 2        | 3      |
|        | Moderate | 6         | 2    | 0        | 0      |
|        | Severe   | 1         | 0    | 0        | 3      |
|        |          | No        | Mild | Moderate | Severe |
|        |          | Predicted |      |          |        |

Figure 20: Confusion matrix of NB with oxidative stress biomarkers as the main features.

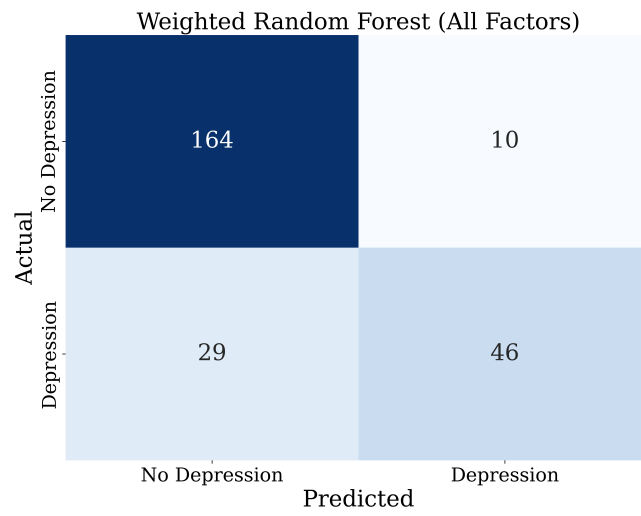

Figure 21: Confusion matrix of weighted RF with all features.

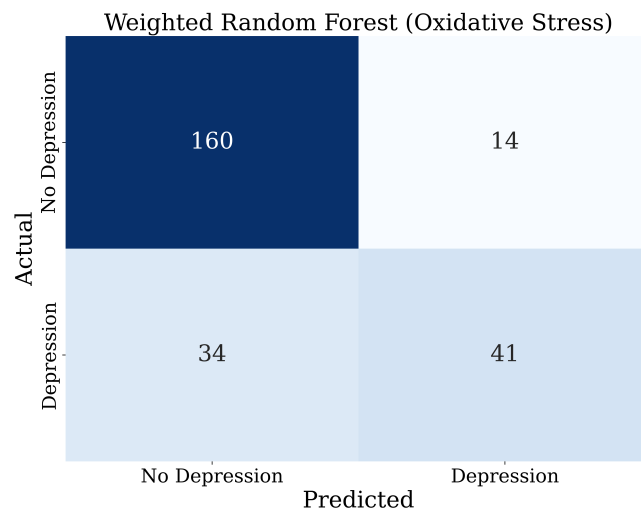

Figure 22: Confusion matrix of weighted RF with oxidative stress biomarkers as the main features.

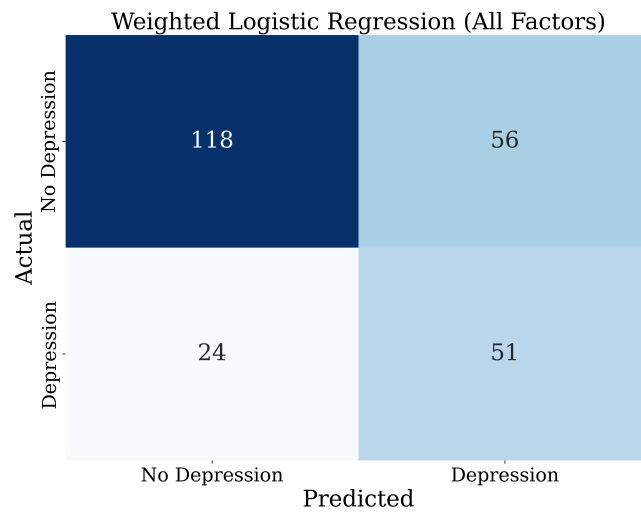

Figure 23: Confusion matrix of weighted LR with all features.

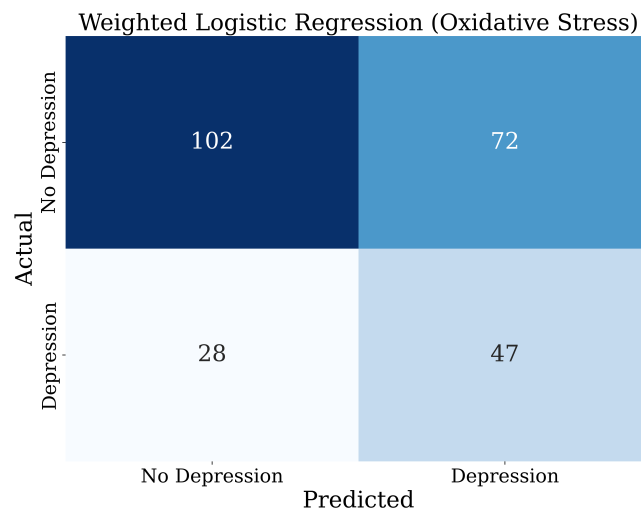

Figure 24: Confusion matrix of weighted LR with oxidative stress biomarkers as the main features.

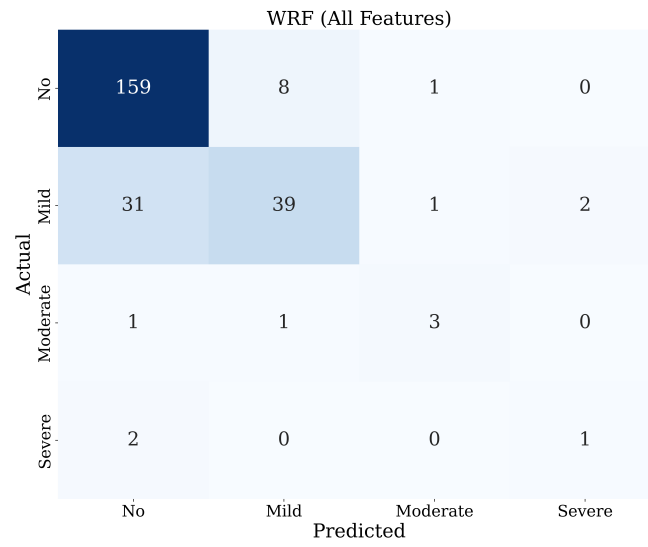

Figure 25: Confusion matrix of weighted RF with all features.

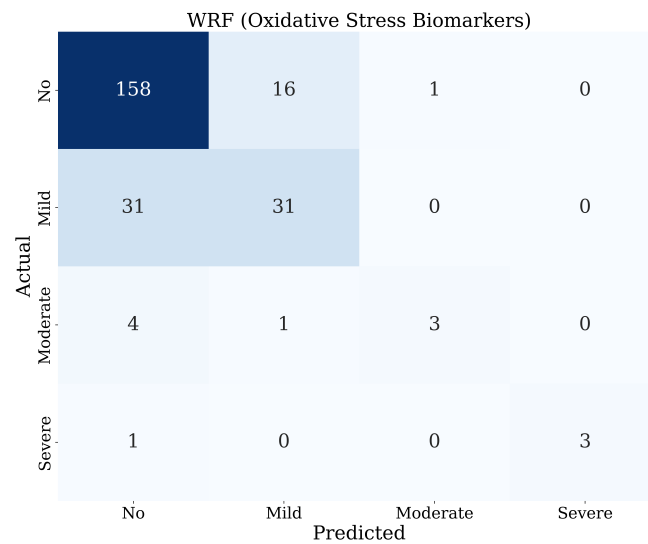

Figure 26: Confusion matrix of weighted RF with oxidative stress biomarkers as the main features.

WLR (All Features)

|        |          |           |      |          |        |
|--------|----------|-----------|------|----------|--------|
| Actual | No       | 145       | 17   | 5        | 1      |
|        | Mild     | 30        | 30   | 4        | 9      |
|        | Moderate | 2         | 2    | 0        | 1      |
|        | Severe   | 1         | 1    | 0        | 1      |
|        |          | No        | Mild | Moderate | Severe |
|        |          | Predicted |      |          |        |

Figure 27: Confusion matrix of weighted LR with all features.

WLR (Oxidative Stress Biomarkers)

|        |          |           |      |          |        |
|--------|----------|-----------|------|----------|--------|
| Actual | No       | 162       | 8    | 0        | 5      |
|        | Mild     | 47        | 10   | 0        | 5      |
|        | Moderate | 8         | 0    | 0        | 0      |
|        | Severe   | 0         | 1    | 0        | 3      |
|        |          | No        | Mild | Moderate | Severe |
|        |          | Predicted |      |          |        |

Figure 28: Confusion matrix of weighted LR with oxidative stress biomarkers as the main features.
